# Supplementary material for: Testing ATRA and MEK inhibitor PD0325901 effectiveness in a nude mouse model for human MPNST xenografts
Source: PubMed Central journal article supplement (PMC6064132; doi:10.1186/s13104-018-3630-0), 2018-07-28
Supplement: 13104_2018_3630_MOESM1_ESM.pdf [file 13104_2018_3630_MOESM1_ESM.pdf]

Table with columns: Placebo n=10, Mouse 5-14, Mean tumor vol, Mean tumor volume (mm³), STDEV, AVERAGE VOLUME. Rows include days 7-62 and Diff68-42.

Group 1 = placebo  
Group 3 = ATRA  
Group 4 = MEKI

Table with columns: ATRA n=9, Mouse 25-34, Mean tumor vol, Mean tumor volume (mm³), STDEV, AVERAGE VOLUME. Rows include days 7-62 and Diff68-42.

Table with columns: MEKI n=10, Mouse 35-44, Mean tumor vol, Mean tumor volume (mm³), STDEV, AVERAGE VOLUME. Rows include days 7-62 and Diff68-42.
